# Supplementary material for: Epidemiological Aspects of Maternal and Congenital Toxoplasmosis in Panama
Source: MDPI journal article supplement (doi:10.3390/pathogens10060764), 2021-06-17
Supplement: s1 [file s1]

**Table S1**  
**Regions and communities surveyed in this study.**

| <b>Region</b> | <b>Communities</b>                                                                                                                                                                                   |
|---------------|------------------------------------------------------------------------------------------------------------------------------------------------------------------------------------------------------|
| Metro         | San Francisco, Bethania, Río Abajo, Parque Lefevre, Juan Díaz.                                                                                                                                       |
| West          | Barrio Balboa, Barrio Colón, El Coco, Guadalupe, Playa Leona, Puerto caimito, Arraiján, Burunga, Cerro Silvestre, Juan Demóstenes Arosemena, Nuevo Emperador, Veracruz, Vista Alegre, Chame, Capira. |
| Central       | Curundu, Ancon, Santa Ana, Calidonia, Bella Vista, El Chorrillo.                                                                                                                                     |
| North         | Alcalde Díaz, Chilibre, Las Cumbres, Ernesto Córdoba Campos.                                                                                                                                         |
| East          | Las Mañanitas, Pacora, Tocumen, 24 de Diciembre, Pedregal, Chepo.                                                                                                                                    |
| San Miguelito | Mateo Iturralde, José Domingo Espinar, Victoriano Lorenzo, Amelia Denis de Icaza, Arnulfo Arias, Belisario Porras, Belisario Frias, Omar Torrijos, Rufina Alfaro.                                    |
